# Supplementary material for: Dual cellular stimuli-responsive hydrogel nanocapsules for delivery of anticancer drugs
Source: Royal Society of Chemistry journal article supplement (doi:10.1039/c6tb00651e), 2016-01-01
Supplement: c6tb00651e1.pdf [file c6tb00651e1.pdf]

Manuscript ID: TB-ART-03-2016-000651

## Dual Cellular Stimuli-Responsive Hydrogel Nanocapsules for Delivery of Anticancer Drugs

Qiangying Yi, Jin Ma, Ke Kang, Zhongwei Gu\*

National Engineering Research Center for Biomaterials, Sichuan University, 29 Wangjiang Road, Chengdu 610064, China

\*Corresponding author: [zwgu@scu.edu.cn](mailto:zwgu@scu.edu.cn), +86-028-85410336

### Electronic Supplementary Information (ESI):

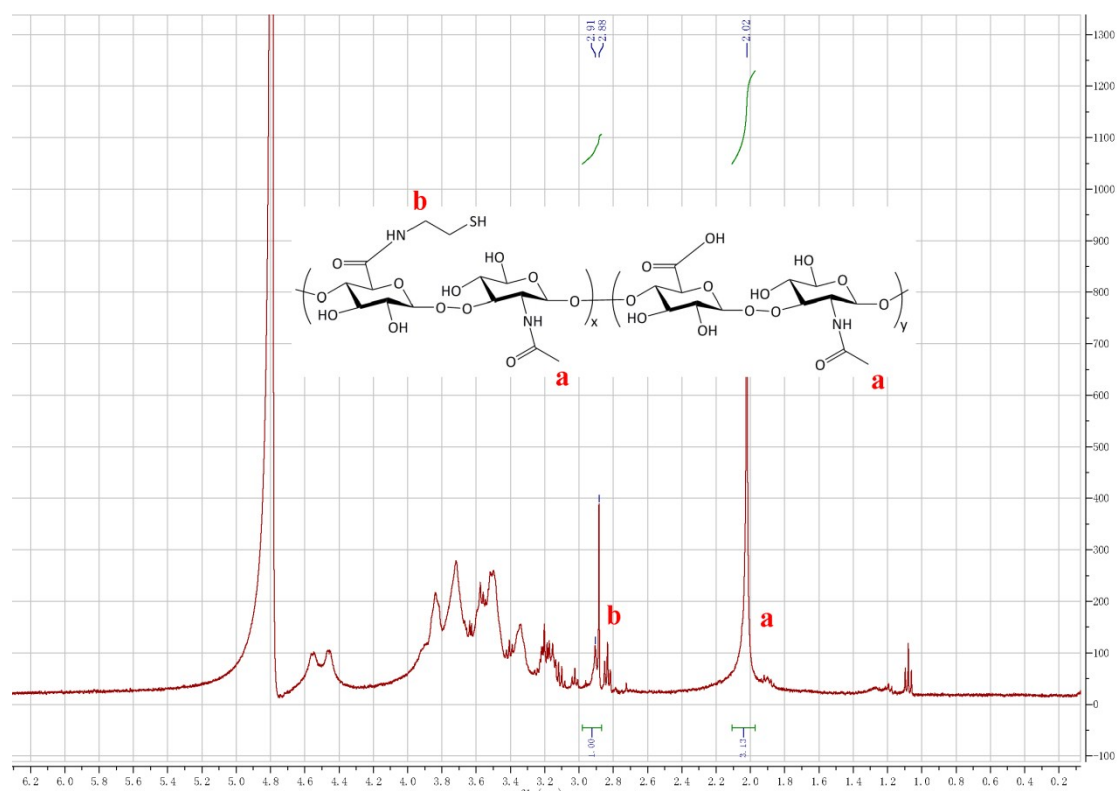

Fig. S1 <sup>1</sup>H NMR spectrum of HA<sub>SSH</sub>. \*The signal centered at  $\delta=2.88$  ppm (peak b) represented methylene protons of the cysteamine moieties, and the signal centered at  $\delta=2.01$  ppm (peak a) represented acetamido moiety of HA.

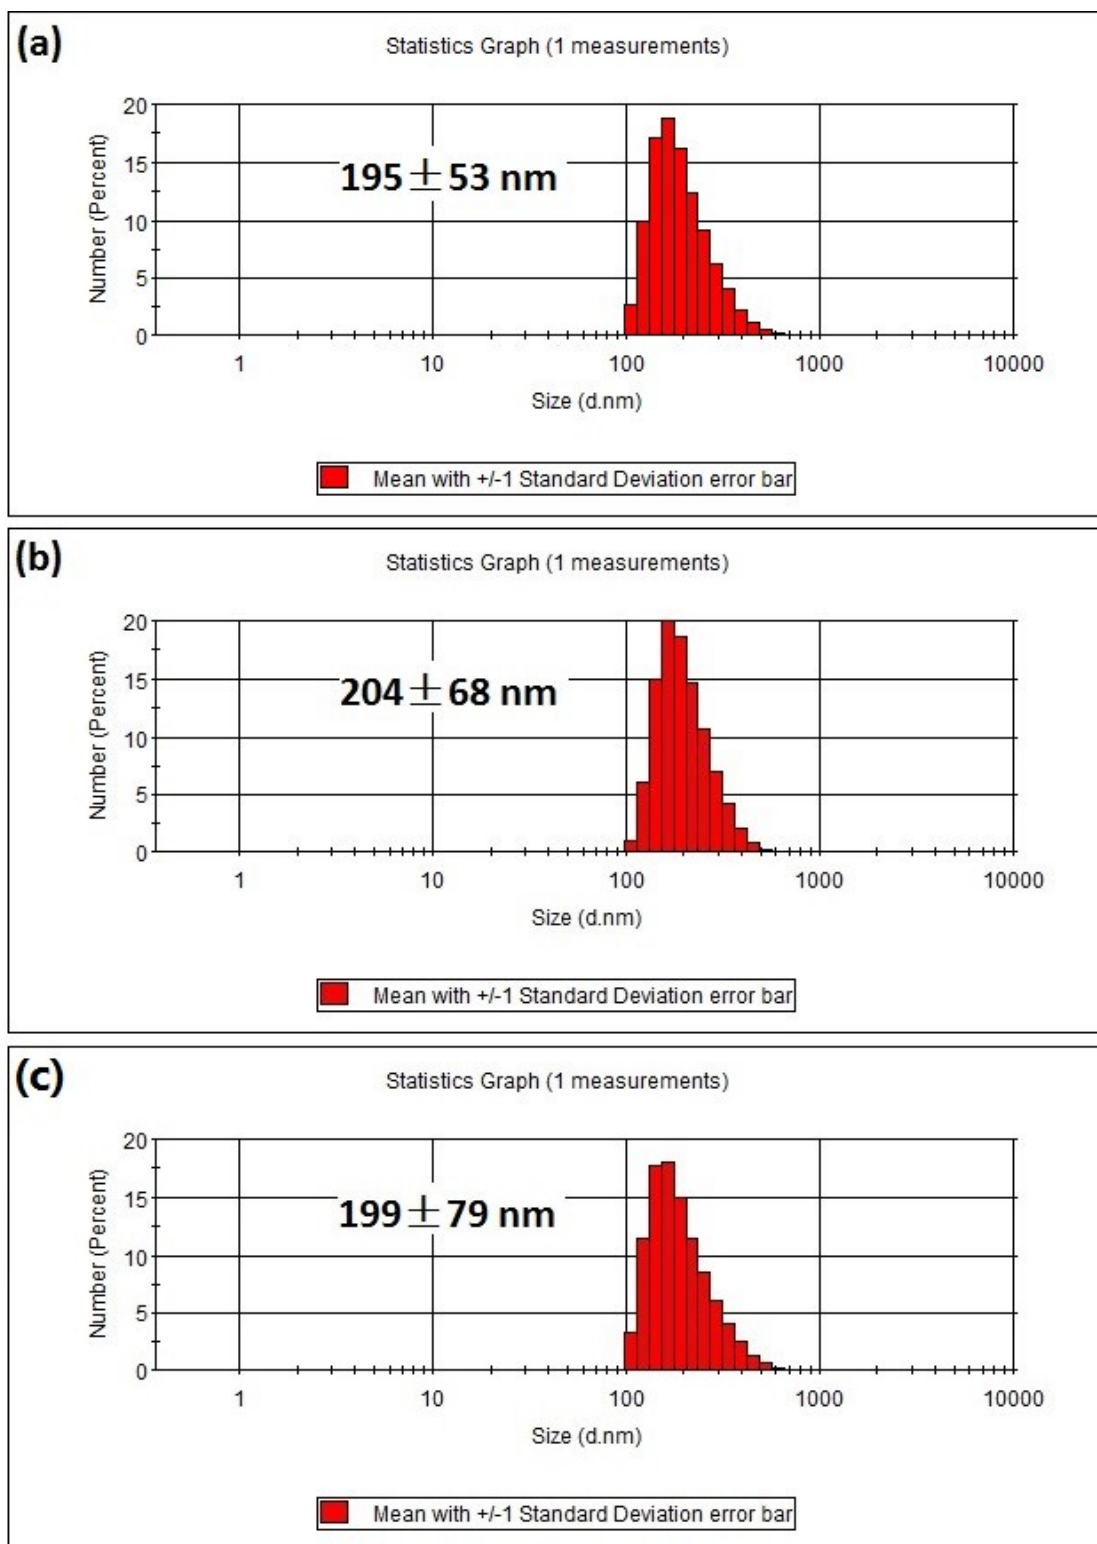

Fig. S2 Size distribution of the DOX/HA-NCs in PBS. The DLS measurements were carried out at (a) day 0, (b) day 1 and (c) day 34.
